# Supplementary material for: Observability of planetary waves and their predictability in the ECMWF H500 forecasts
Source: Copernicus journal article supplement (doi:10.5194/asr-4-5-2010), 2010-02-19
Supplement: Supplementary file 1 [file asr-4-5-2010-supplement.pdf]

## SUPPLEMENTAL INFORMATION

Verification of the ECMWF H500 forecasts as these are represented by spherical harmonics over the Northern Hemisphere (period of the verification) March – August

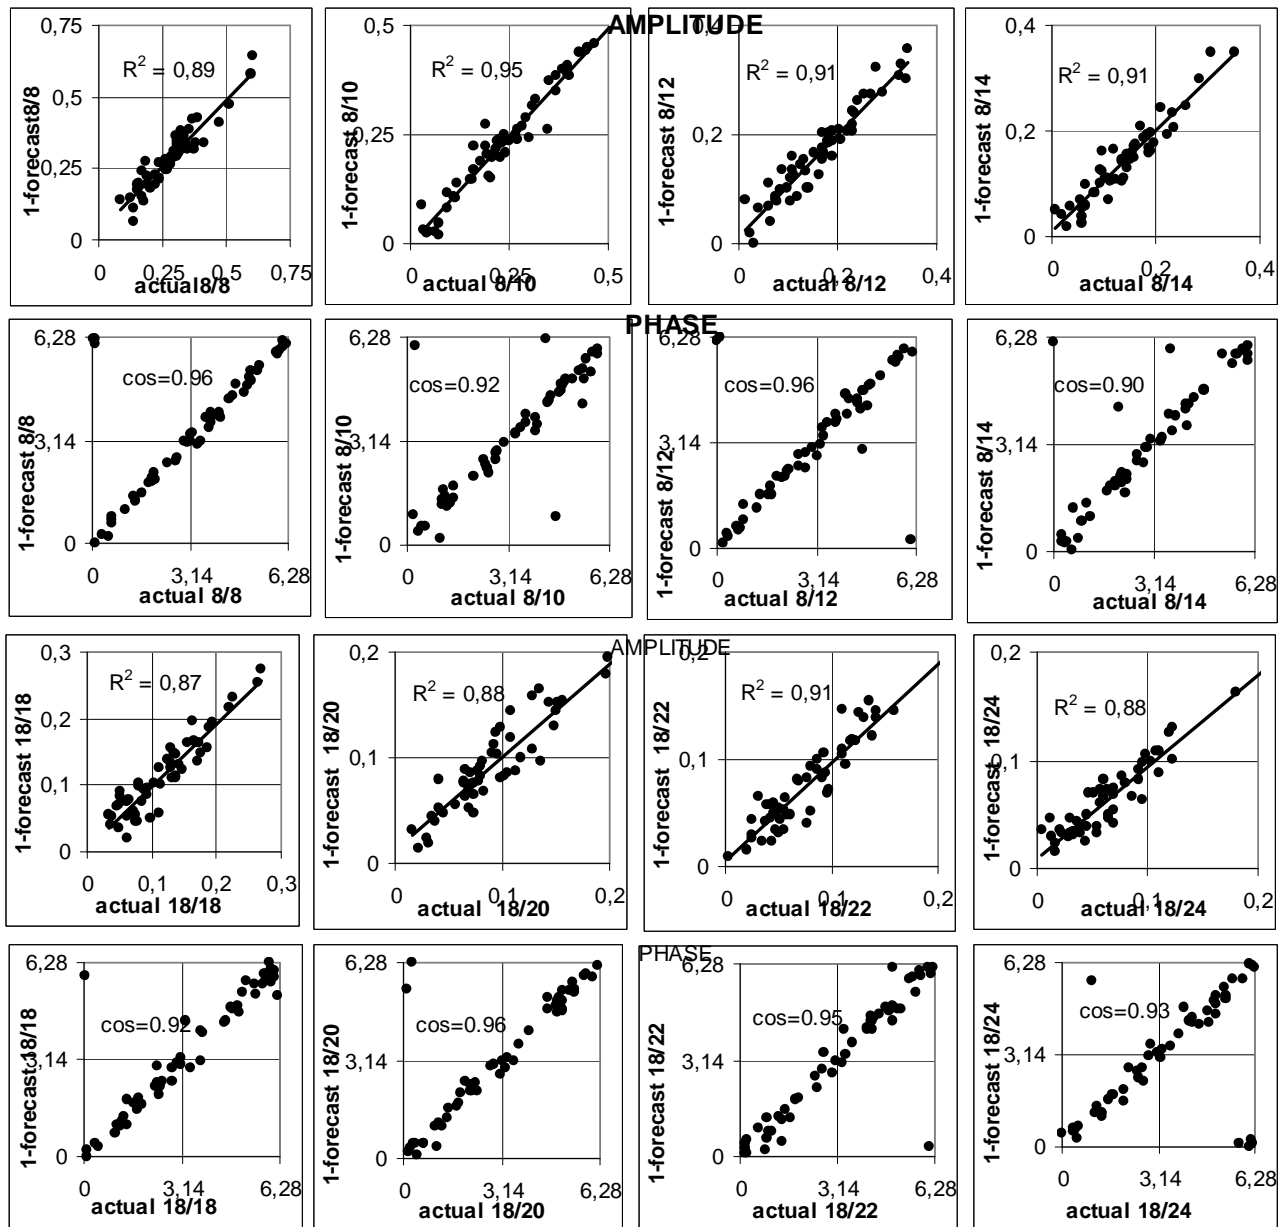

Fig. 1

Relationships between actual and forecasted (1-day lead time) amplitudes and phases of the synoptic observable ( $m=8, n=8, 10, 12, 14$ ) and the synoptic unobservable ( $m=18, n=18, 20, 22, 24$ ) waves in the H500-fields of the Northern Hemisphere. Squared correlations between actual and 6-forecasted amplitudes as well as mean values of cosine of the actual and 1-forecasted phase differences are indicated as quantitative measures of the 6-day forecast skill. The respective relationships between the ultra-long waves do not shown because their skill is very similar to the skill of the waves shown in this figure.

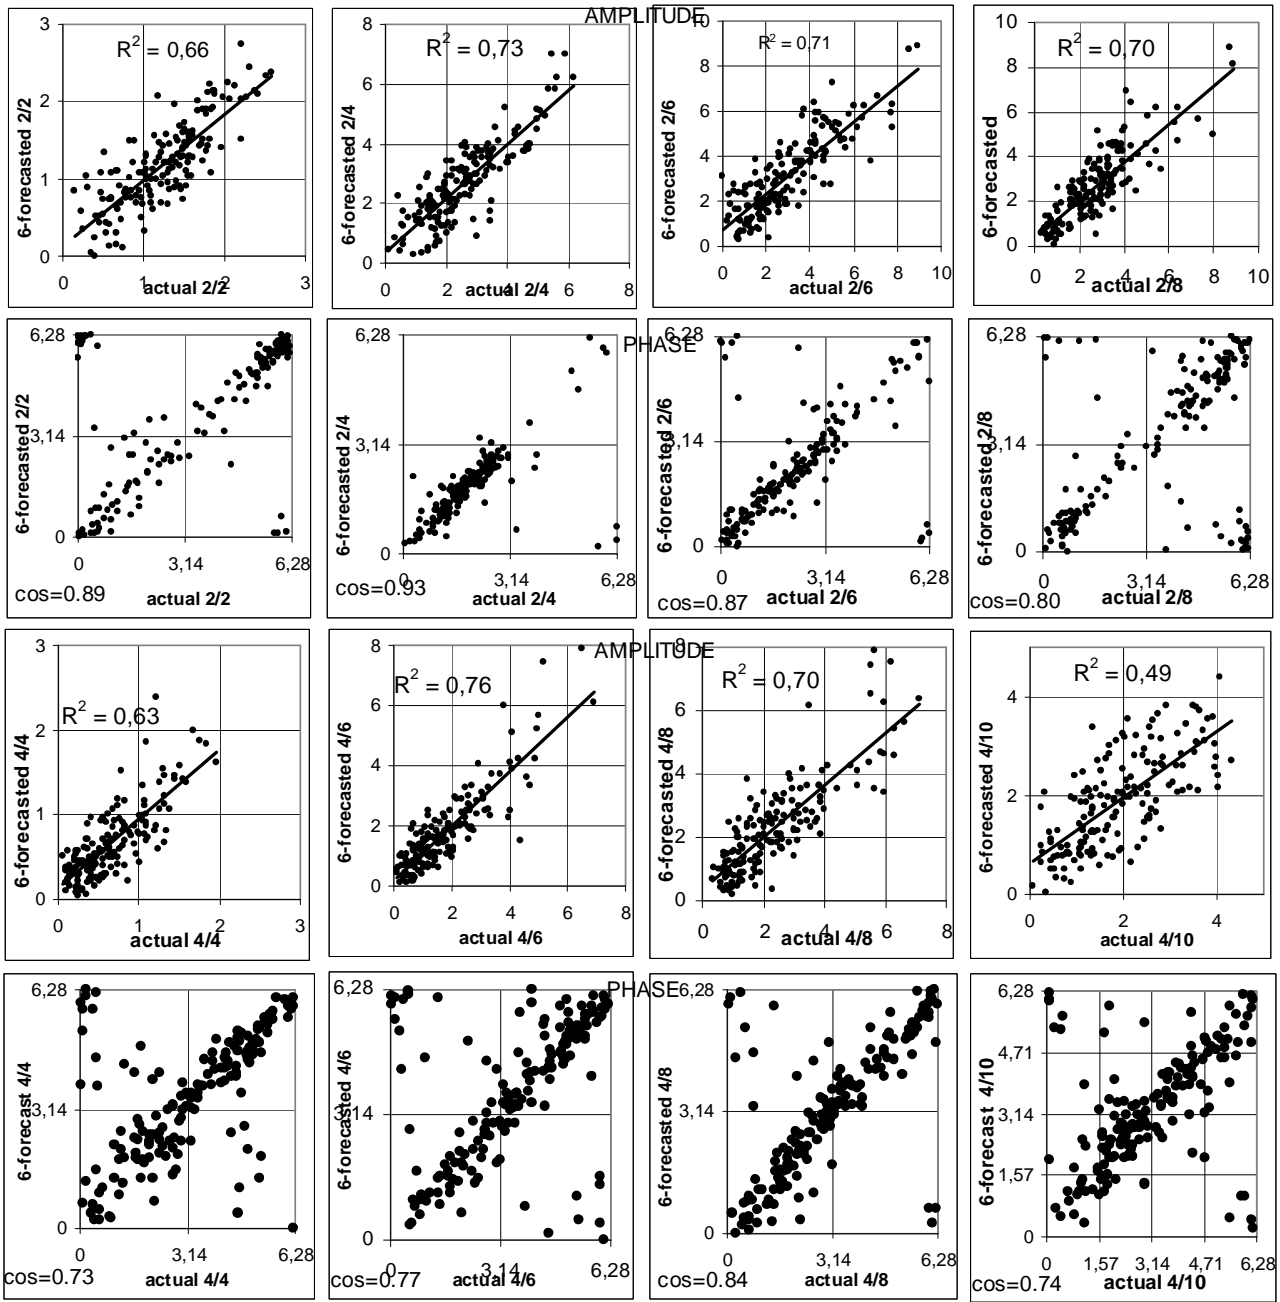

Fig. 2

Relationships between actual and forecasted (6-day lead time) amplitudes and phases of the ultra-long observable ( $m=2, n=2, 4, 6, 8$ ; and  $m=4, n=4, 6, 8, 10$ ) waves in the H500-fields of the Northern Hemisphere. Squared correlations between actual and 6-forecasted amplitudes as well as mean values of cosine of the actual and 6-forecasted phase differences are indicated as quantitative measures of the 6-day forecast skill.

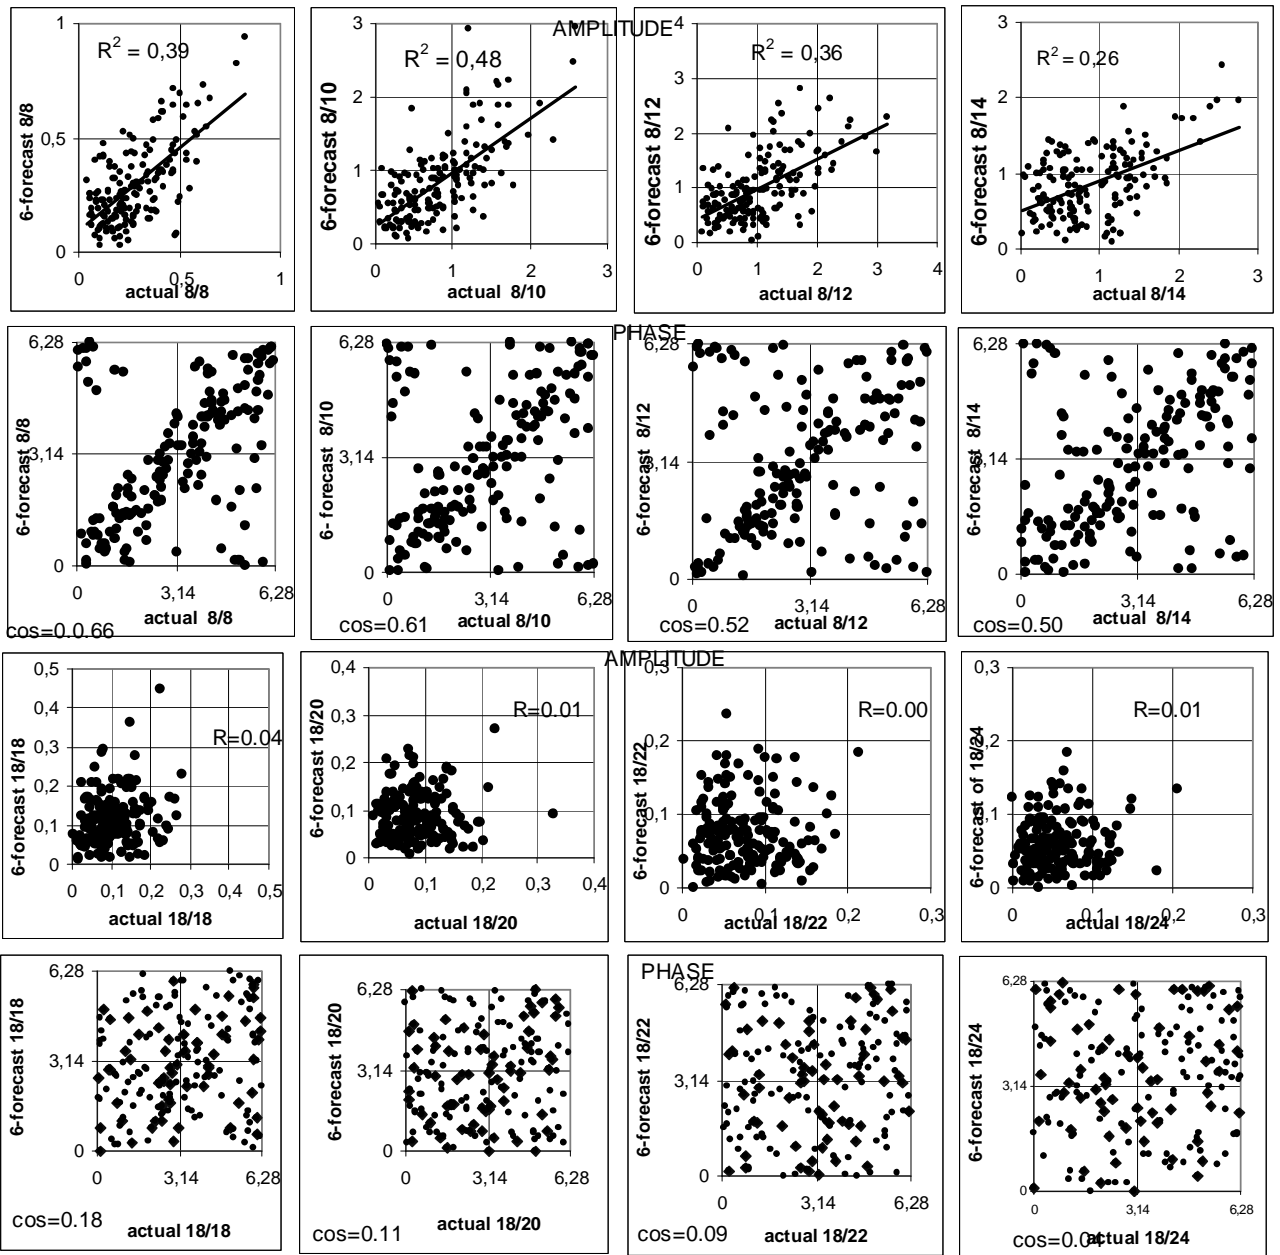

Fig. 3

Relationships between actual and forecasted (6-day lead time) amplitudes and phases of the synoptic observable ( $m=8, n=8, 10, 12, 14$ ) and the synoptic unobservable ( $m=18, n=18, 20, 22, 24$ ) waves in the H500-fields of the Northern Hemisphere. Squared correlations between actual and 6-forecasted amplitudes as well as mean values of cosine of the actual and 6-forecasted phase differences are indicated as quantitative measures of the 6-day forecast skill.
